# Supplementary material for: Evolutionary Analysis and Functional Identification of Clock-Associated PSEUDO-RESPONSE REGULATOR (PRRs) Genes in the Flowering Regulation of Roses
Source: MDPI journal article supplement (doi:10.3390/ijms23137335), 2022-06-30
Supplement: s1 [file s1]

## Supplementary Tables

**Table S1.** Gene of the species that were not used in this study and deleted due to their partial/short sequences.

| Specie                      | Gene ID                                      |
|-----------------------------|----------------------------------------------|
| <i>Arabidopsis lyrata</i>   | AL8G36710.t2                                 |
|                             | AL6G52690.t1                                 |
| <i>Arabidopsis halleri</i>  | Araha.20024s0001.1.p                         |
| <i>Fragaria ananassa</i>    | S29_maker-Fvb5-1-snap-gene-91.65-mRNA-1      |
|                             | S29_maker-Fvb4-3-augustus-gene-246.20-mRNA-1 |
| <i>Fragaria vesca</i>       | gene37163-v2.0.a2-hybrid.t2                  |
| <i>Cerasus yedoensis</i>    | S16_CYE_r3.1SPE4_g004370.1                   |
| <i>Malus baccata</i>        | S10_MABA036231                               |
| <i>Malus domestica</i>      | MD14G1204500                                 |
|                             | MD07G1182300                                 |
| <i>Potentilla micrantha</i> | S23_8925_t                                   |
| <i>Prunus persica</i>       | Prupe.5G197800.1.p                           |
| <i>Prunus dulcis</i>        | S20_Prudul26A024659P1                        |
| <i>Prunus mume</i>          | S17_Pm024864                                 |
| <i>Prunus yedoensis</i>     | S22_Pyn_C2490.49                             |
|                             | S22_Pyn_C0034.46                             |
|                             | S22_Pyn_C2268.2                              |
| <i>Pyrus betulifolia</i>    | S14_GWHPAAYT018966                           |
| <i>Pyrus bretschneideri</i> | S15_rna4054                                  |
| <i>Rosa multiflora</i>      | S32_Rmu_co8346237.1_g000001.1                |
| <i>Vitis vinifera</i>       | VIT_217s0000g06520.1                         |
|                             | VIT_217s0000g06560.1                         |

**Table S2.** Primers used in VIGS for amplification of genes fragments of *Rosa chinensis*.

| Gene Name      | Primer                                             |
|----------------|----------------------------------------------------|
| <i>RcPRR1a</i> | F: TAGATAGGAGCAAGGTGAGG<br>R: AGACCTCATCCTGTGCCGAC |
| <i>RcPRR5</i>  | F: AAGAACAATGGCGGAGGTGG<br>R: CCTTGCCTTCAGTATTTCCC |

**Table S3.** Primers used for qPCR to check the relative expression of clock *PRRs* in *Rosa chinensis*.

| Gene Name      | Primers                  |
|----------------|--------------------------|
| <i>RcPRR1a</i> | F: ATTGCCTGCCCATGCTTCGT  |
|                | R: GCTGCGGCATGATTGTCAT   |
| <i>RcPRR5</i>  | F: TGTTCAGGGCTGCTCCAGAGA |
|                | R: ACGCTGCTCTGCAAGCTTCT  |
| <i>RcCO</i>    | F: GATACCACCGAGGACGGGTT  |
|                | R: CAGGACGCAGCCTCATCTTC  |
| <i>RcFT</i>    | F: TGCCGAGCTCTACAATCTTGG |
|                | R: CATCACTTGAACCCGCCACT  |

**Table S4.** Basic Parameters of clock *PRRs* of *Rosa chinensis*.

| Gene ID                     | Gene Name      | Location          | Chro | AA  | CDS  | Intron | MW/kDa   | PI   | Predicted subcellular localization |
|-----------------------------|----------------|-------------------|------|-----|------|--------|----------|------|------------------------------------|
| <i>RchiOBHm_Ch7g0182001</i> | <i>RcPRR1a</i> | 3406338-3411730   | 7    | 535 | 1608 | 5      | 60139.19 | 5.77 | Nucleus                            |
| <i>RchiOBHm_Ch7g0181991</i> | <i>RcPRR1b</i> | 3400868-3402542   | 7    | 186 | 570  | 3      | 21258.23 | 4.48 | Chloroplast                        |
| <i>RchiOBHm_Ch1g0382871</i> | <i>RcPRR5</i>  | 67470339-67474553 | 1    | 683 | 2086 | 7      | 75938.56 | 6.25 | Nucleus                            |
| <i>RchiOBHm_Ch1g0364431</i> | <i>RcPRR3</i>  | 55607081-55612137 | 1    | 761 | 2324 | 7      | 83837.41 | 5.86 | Nucleus                            |
| <i>RchiOBHm_Ch3g0468241</i> | <i>RcPRR7</i>  | 14299140-14304817 | 3    | 754 | 2302 | 8      | 82454.83 | 8.31 | Mitochondrion                      |
