# Supplementary material for: Evolutionary Analysis and Functional Identification of Clock-Associated PSEUDO-RESPONSE REGULATOR (PRRs) Genes in the Flowering Regulation of Roses
Source: MDPI journal article supplement (doi:10.3390/ijms23137335), 2022-06-30
Supplement: s1 [file s1]

## Supplementary Figures

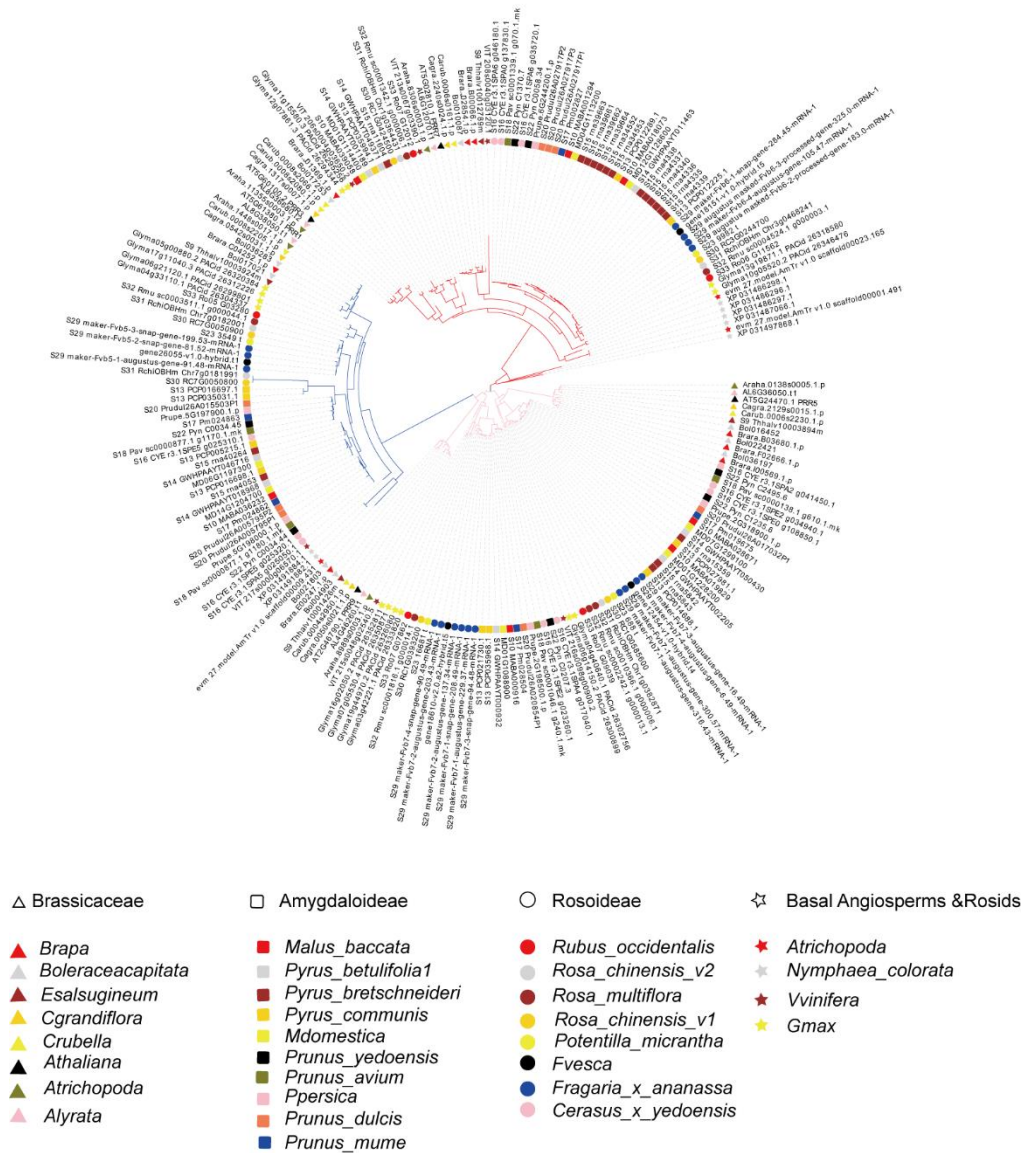

**Figure S1.** Phylogeny of clock genes from 2 basal angiosperm species, 18 Rosaceae species, 8 Brassicaceae species, and 2 Basal Rosids species. Different branch colors represent different clades.

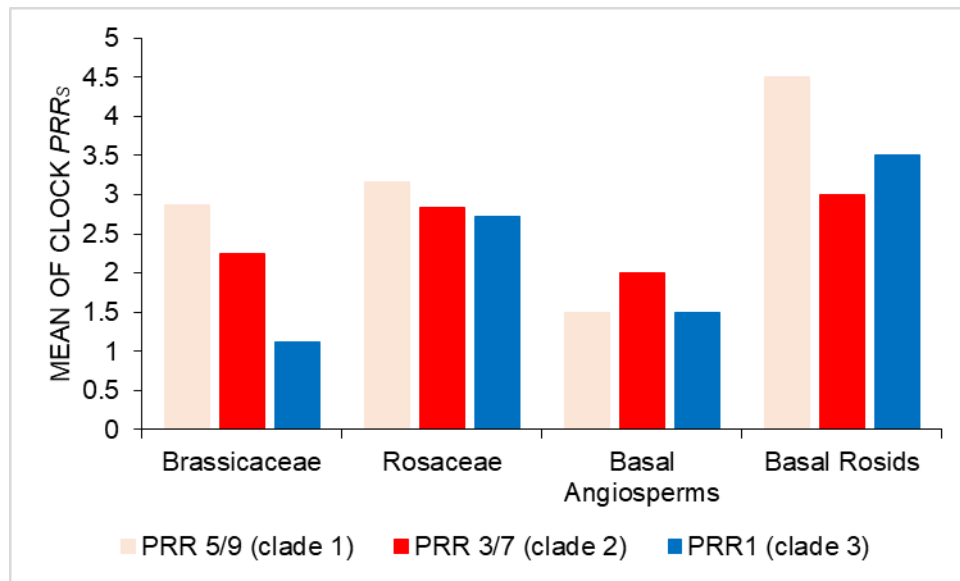

**Figure S2.** Mean values of the number of clock *PRRs* in each clade of 8 Brassicaceae species, 18 Rosaceae species, 2 basal angiosperm species, and 2 Basal Rosids species.

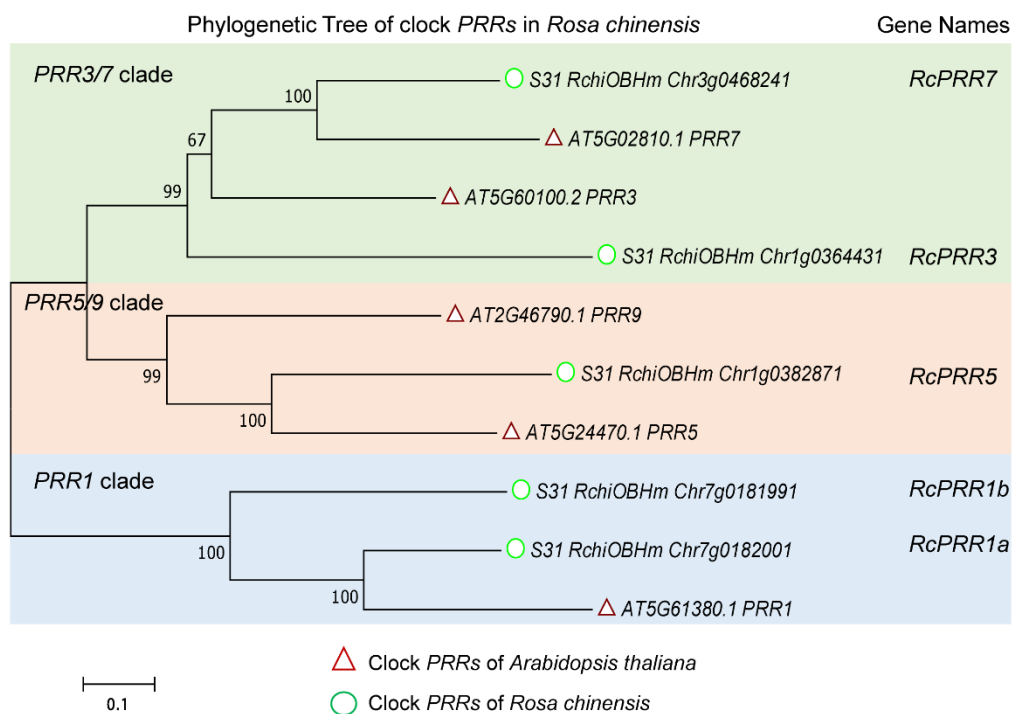

**Figure S3.** Phylogenetic tree of clock *PRRs* in *Rosa chinensis*.

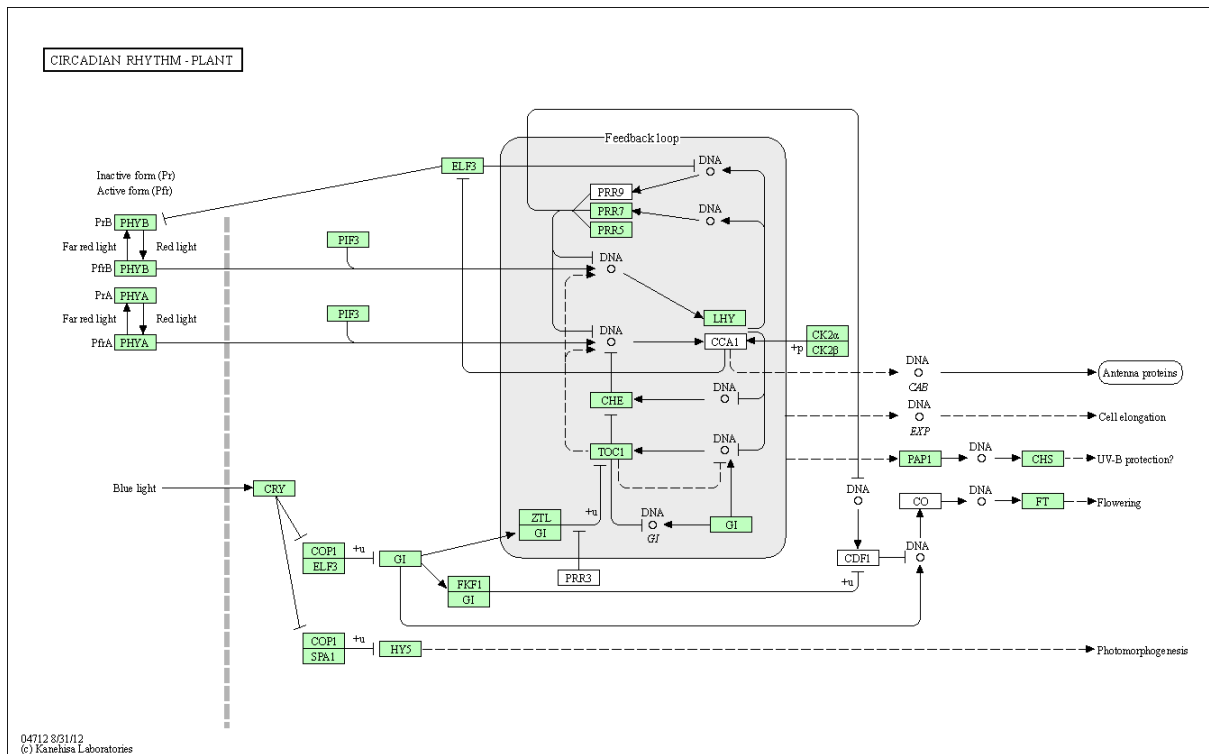

**Figure S4.** The pattern of clock *PRRs* genes for controlling flowering in the circadian rhythm KEGG pathway.
